# Supplementary material for: Cell surface marker profiling of human tracheal basal cells reveals distinct subpopulations, identifies MST1/MSP as a mitogenic signal, and identifies new biomarkers for lung squamous cell carcinomas
Source: PubMed Central journal article supplement (PMC4343068; doi:10.1186/s12931-014-0160-8), 2014-12-31
Supplement: 12931_2014_160_MOESM7_ESM.pdf [file 12931_2014_160_MOESM7_ESM.pdf]

Tracheal suspension immediately  
after pronase digestion

Tracheal suspensions  
recovered *in vitro*

% TP63-positive cells

Strain 1

20.1

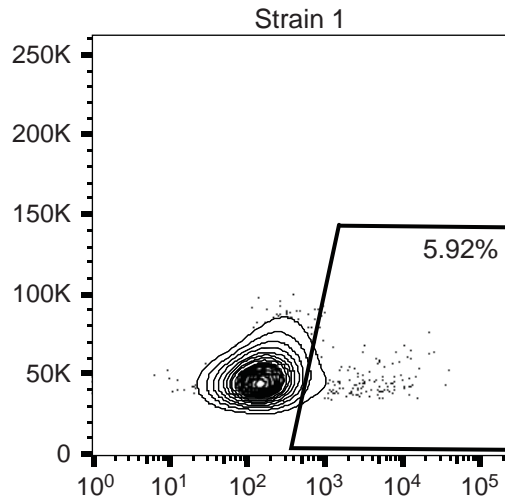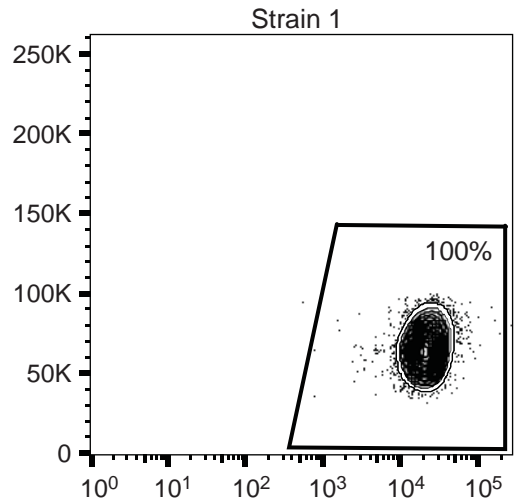

Strain 2

37.9

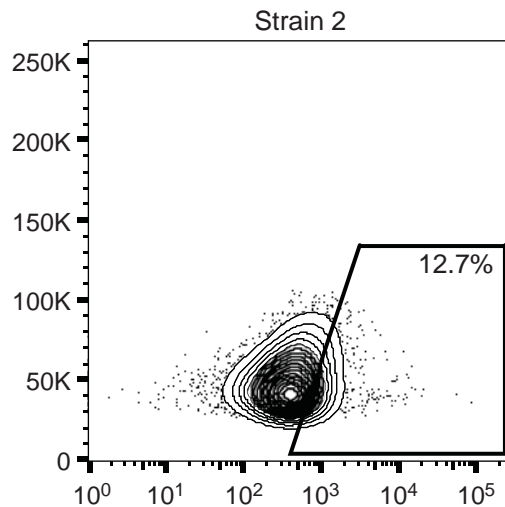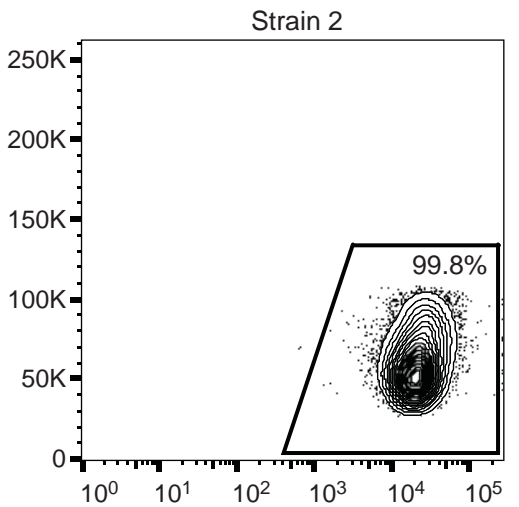

Strain 3

26.3

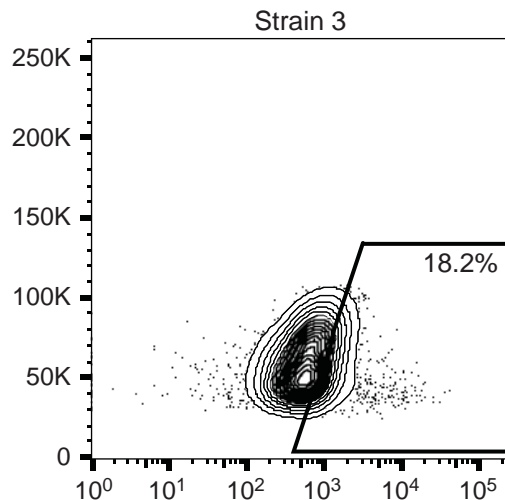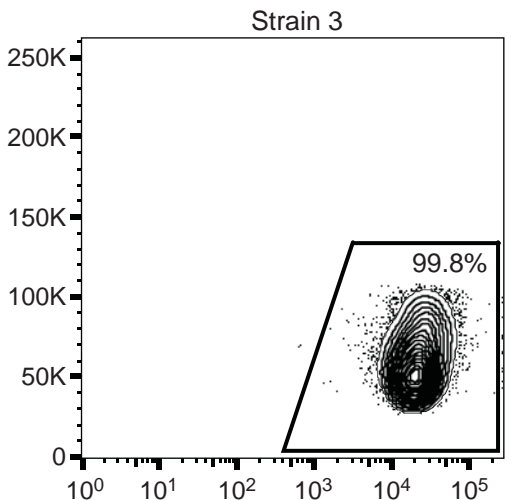

APC- $\alpha$ -CD44

**Figure S2.** Pronase digestion reduces CD44 expression in tracheal basal cells. Cell suspensions freshly prepared from pronase digested tracheas were either cytopspun and stained with anti-TP63 or stained with anti-CD44 antibodies and analyzed by FACS. 250-500 cells were counted per tracheal strain of basal cell. The fluorescence intensity of  $\alpha$ -CD44 staining of non pronase-digested basal cells was determined by using recovered Passage 1 tracheal basal cells.
