# Supplementary material for: Cell surface marker profiling of human tracheal basal cells reveals distinct subpopulations, identifies MST1/MSP as a mitogenic signal, and identifies new biomarkers for lung squamous cell carcinomas
Source: PubMed Central journal article supplement (PMC4343068; doi:10.1186/s12931-014-0160-8), 2014-12-31
Supplement: 12931_2014_160_MOESM8_ESM.pdf [file 12931_2014_160_MOESM8_ESM.pdf]

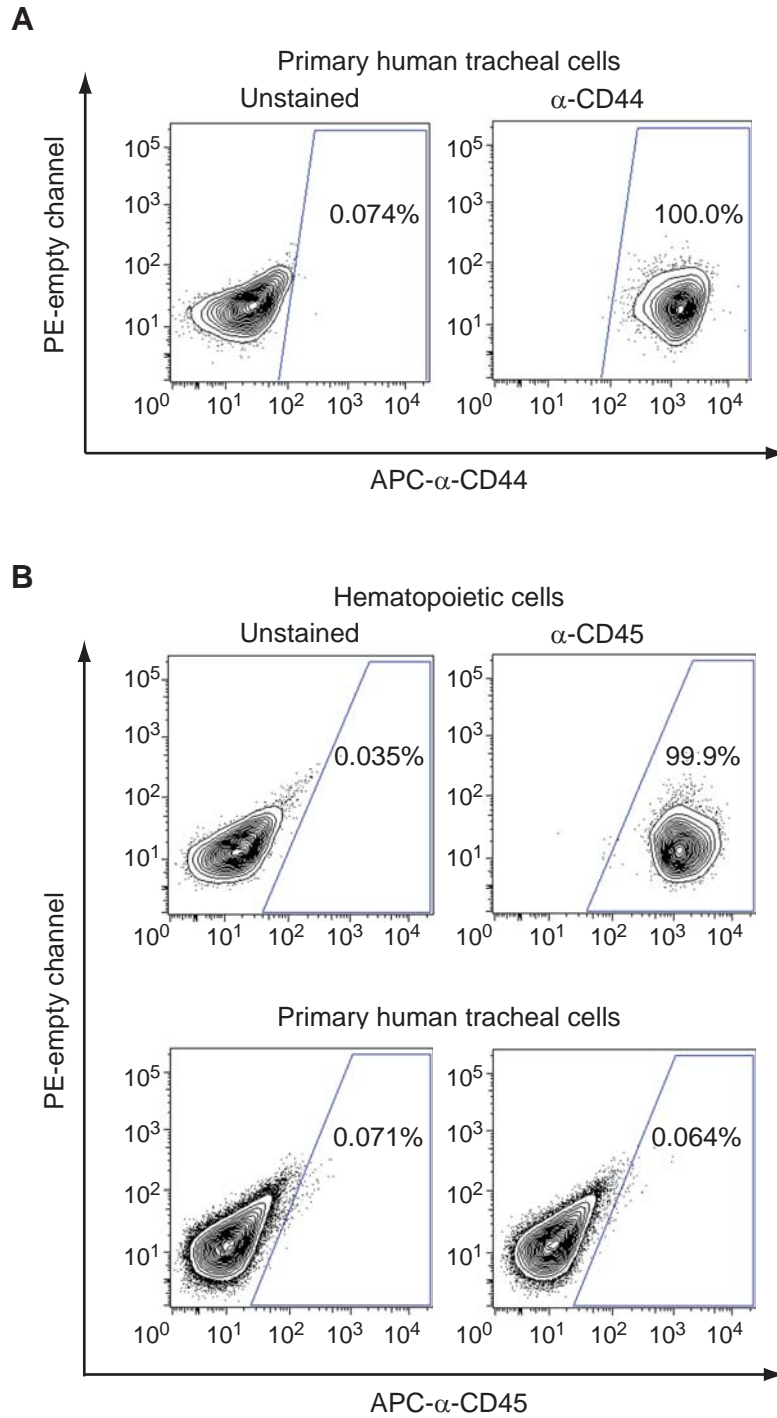

**Figure S3.** Primary human tracheal epithelial cell cultures consist entirely of CD44<sup>+</sup> CD45<sup>-</sup> cells. Primary human tracheal cells were stained with  $\alpha$ -CD44 (A) or  $\alpha$ -CD45 (B) antibodies and analyzed by FACS. 8227 cells, an acute myeloid leukemia-derived hematopoietic cell line, were used as a positive control for  $\alpha$ -CD45 staining.
