# Supplementary material for: Cell surface marker profiling of human tracheal basal cells reveals distinct subpopulations, identifies MST1/MSP as a mitogenic signal, and identifies new biomarkers for lung squamous cell carcinomas
Source: Springer Nature journal article supplement (doi:10.1186/s12931-014-0160-8), 2014-12-01
Supplement: MOESM10 [file 9759560]

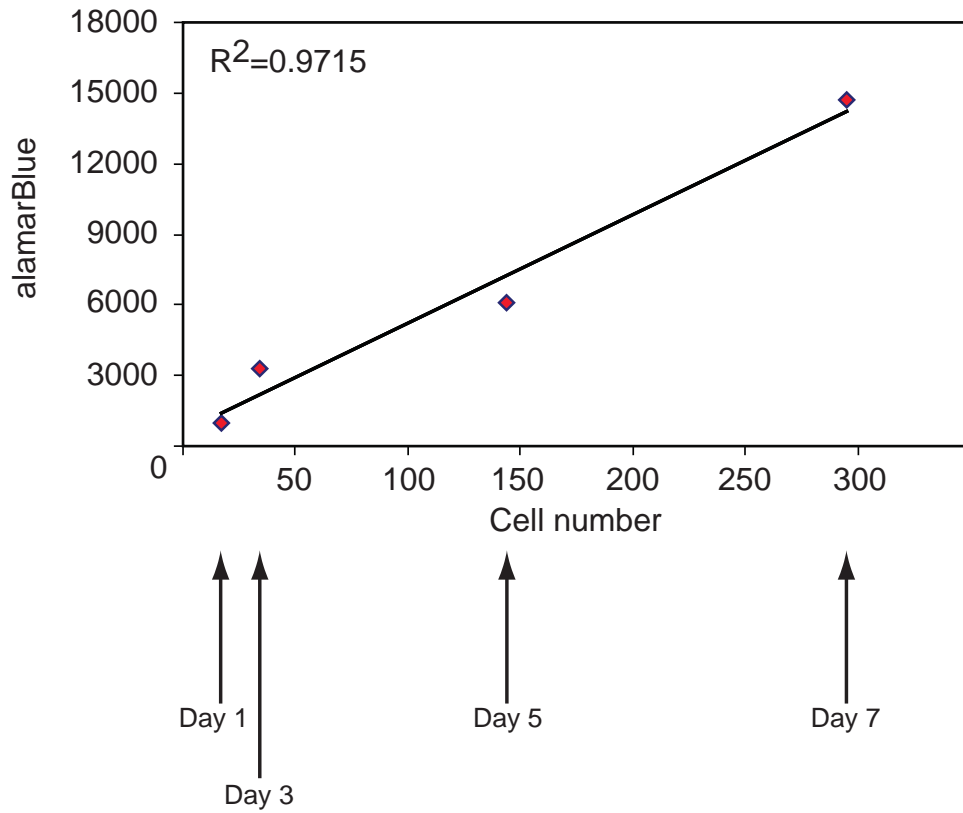

**Figure S4.** AlamarBlue readings are directly proportional to tracheal basal cell number. Human tracheal basal cells were grown *in vitro* in complete LHC-9 medium. Duplicate measurements of alamarBlue and cell number were taken at days 1, 3, 5, and 7 with the means shown.
